# Supplementary material
Source: MDPI journal article supplement (https://www.mdpi.com/2073-4344/13/6/989)
Supplement: s1 [file s1 › catalysts-2401891-supplementary.pdf]

Communication

# Sulfonated Silica Coated $\text{CoFe}_2\text{O}_4$ Magnetic Nanoparticles for the Synthesis of 3,4-Dihydropyrimidin-2(1H)-One and Octahydroquinazoline Derivatives

Mozhgan Afshari <sup>1,\*</sup>, Sónia A. C. Carabineiro <sup>2,\*</sup> and Maryam Gorjizadeh <sup>1</sup>

<sup>1</sup> Department of Chemistry, Shoushtar Branch, Islamic Azad University, Shoushtar, Iran; gorji80@yahoo.com

<sup>2</sup> LAQV-REQUIMTE, Department of Chemistry, NOVA School of Science and Technology, Universidade NOVA de Lisboa, 2829-516 Caparica, Portugal

\* Correspondence: mozhgan.afshari@iau.ac.ir (M.A.); sonia.carabineiro@fct.unl.pt (S.A.C.C.); Tel.: +98-9166-161-157 (M.A.); Fax: +98-6126-231-300 (M.A.)

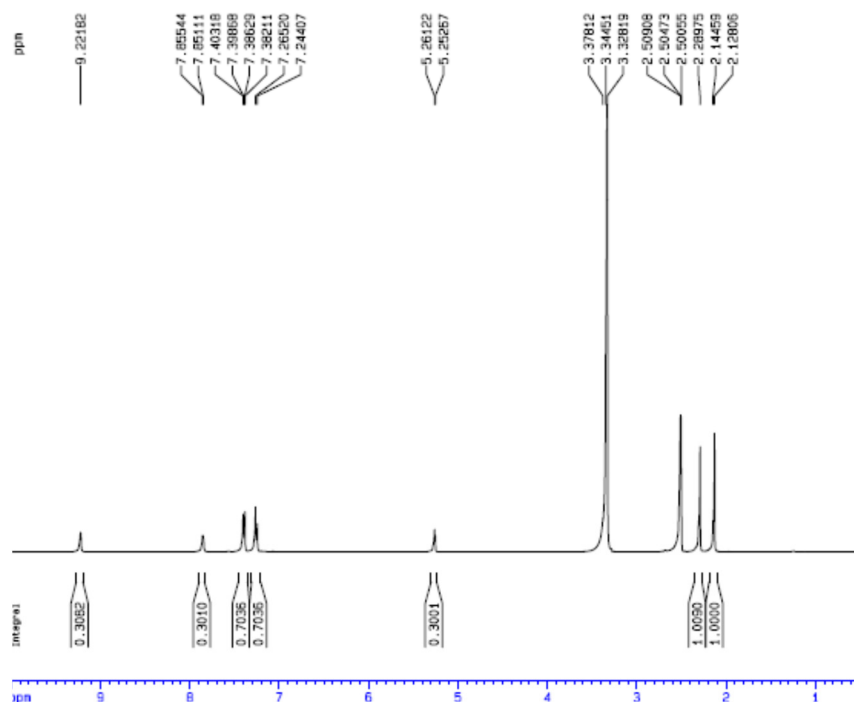

**Figure S1.**  $^1\text{H}$ -NMR: 5-acetyl-4-(4-chlorophenyl)-6-methyl-3,4-dihydropyrimidin-2(1H)-one.

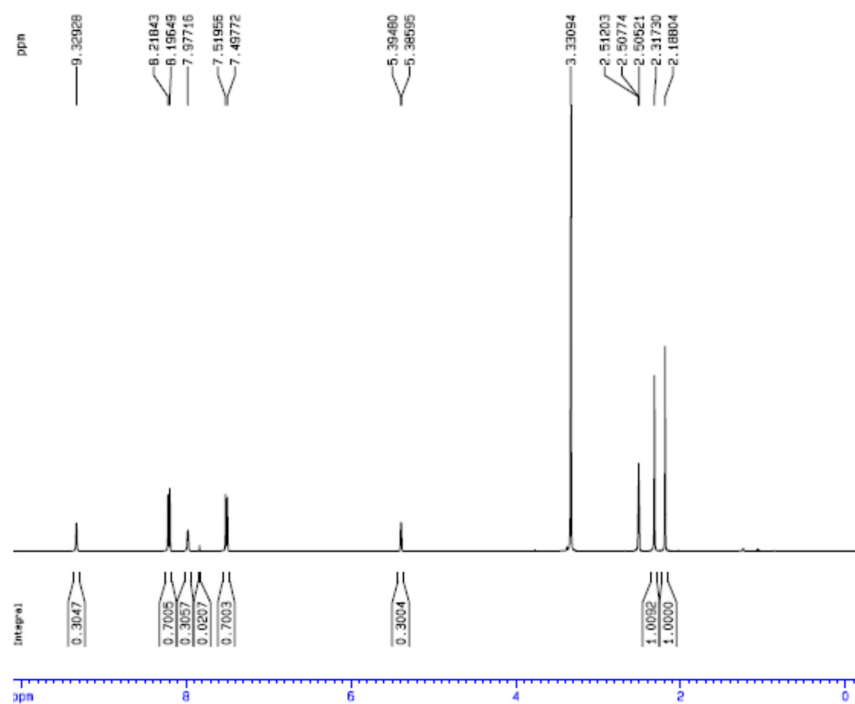

**Figure S2.** <sup>1</sup>H NMR: 5-acetyl-6-methyl-4-(4-nitrophenyl)-3,4-dihydropyrimidin-2(1H)-one.

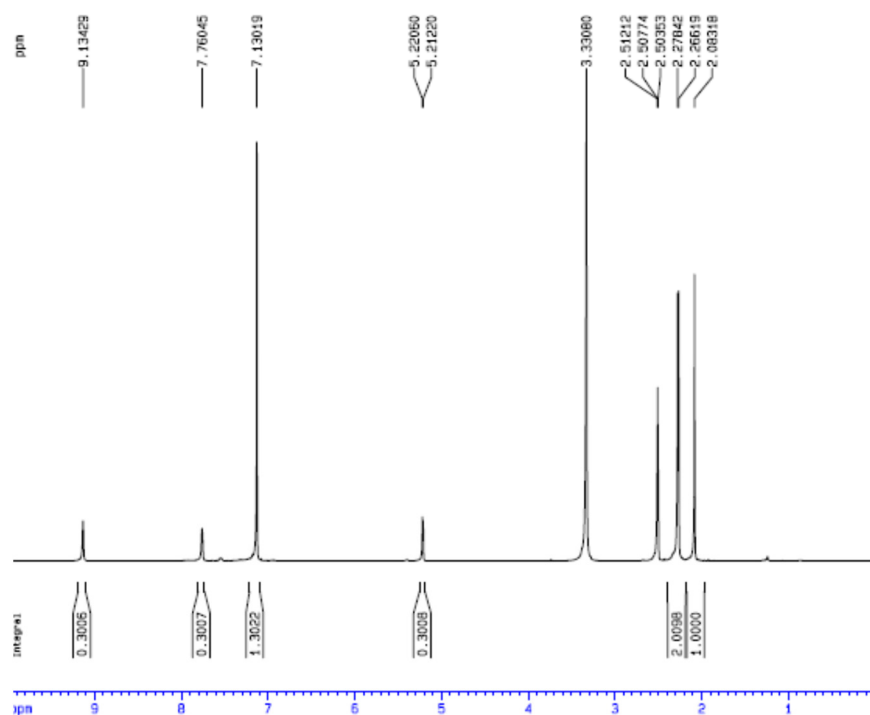

**Figure S3.** <sup>1</sup>H NMR: 5-acetyl-4-(4-methoxyphenyl)-6-methyl-3,4-dihydropyrimidin-2(1H)-one.

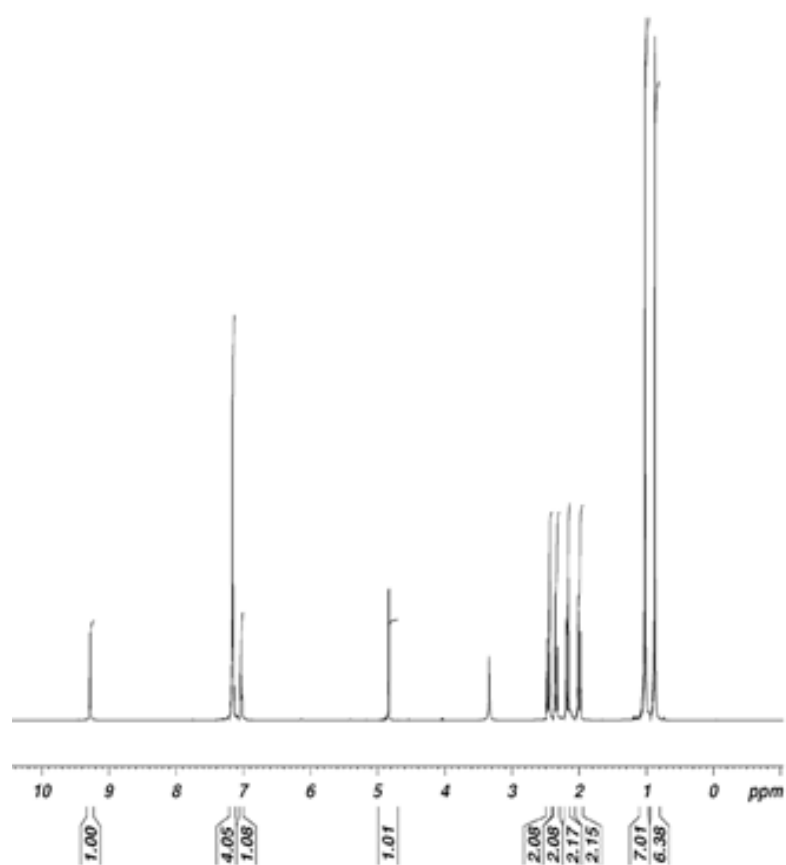

**Figure S4.** <sup>1</sup>H NMR: 4-(benzaldehyde)-7,7-dimethyl-1,2,3,4,5,6,7,8-octahydroquinazoline-2,5-dione.

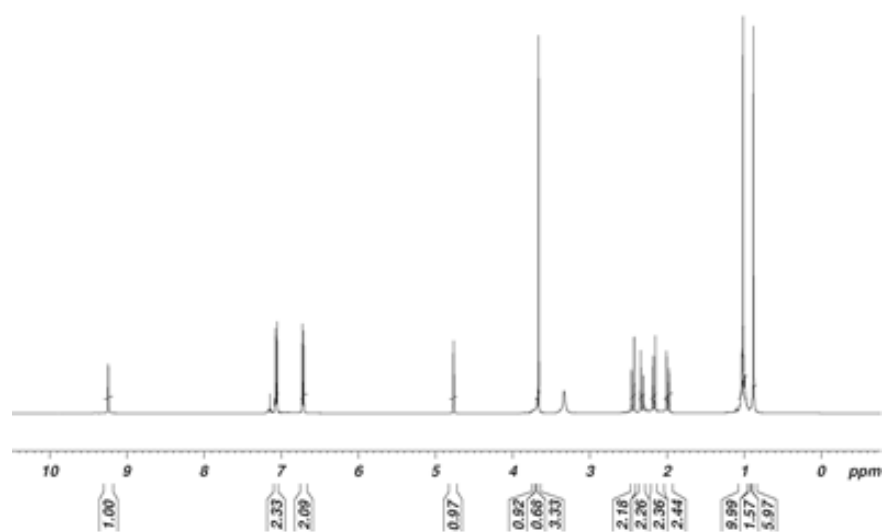

**Figure S5.** <sup>1</sup>H NMR: 4-(4-methoxyphenyl)-7,7-dimethyl-1,2,3,4,5,6,7,8-octahydroquinazoline-2,5-dione.

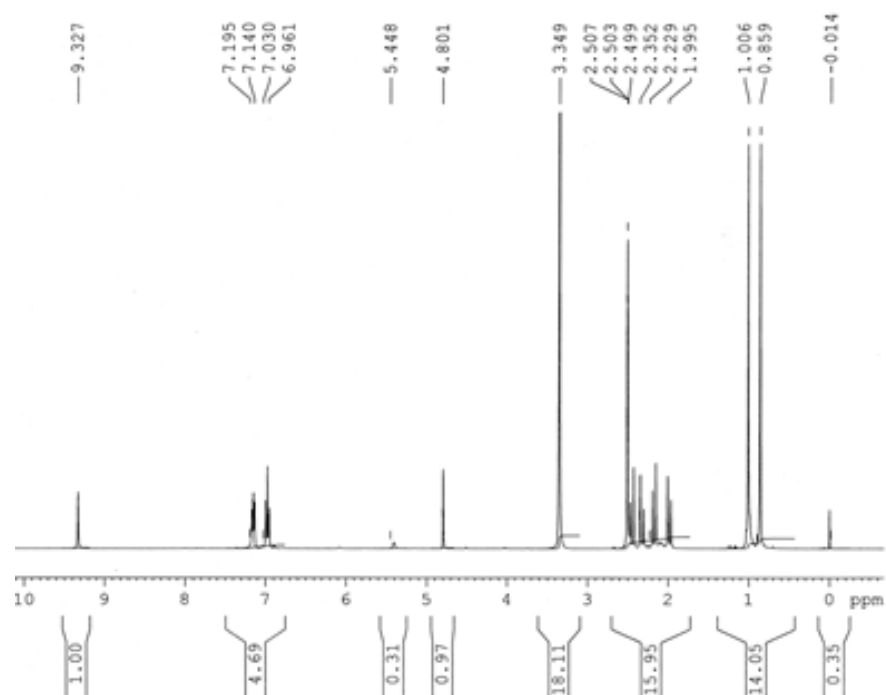

**Figure S6.**  $^1\text{H}$ NMR: 4-(4-chlorobenzaldehyde)-7,7-dimethyl-1,2,3,4,5,6,7,8-octahydroquinazoline-2,5-dione.
